# Supplementary material for: Environmental microbiome diversity and stability is a barrier to antimicrobial resistance gene accumulation
Source: PubMed Central journal article supplement (PMC11162449; doi:10.1038/s42003-024-06338-8), 2024-06-08
Supplement: 42003_2024_6338_MOESM3_ESM.pdf [file 42003_2024_6338_MOESM3_ESM.pdf]

## Description of Additional Supplementary Files

File name: Supplementary data 1

Description: ASV table of river samples and correlation with ARG abundance.

File name: Supplementary data 2

Description: ASV table of soil samples and correlation with ARG abundance.

File name: Supplementary data 3

Description: Soil sample dataset.

File name: Supplementary data 4

Description: River sample dataset.

File name: Supplementary data 5

Description: List of target genes screened through HT-qPCR.

File name: Supplementary data 6

Description: Pairwise Bray-Curtis dissimilarity of soil samples sorted by total ARGs

File name: Supplementary data 7

Description: Pairwise Bray-Curtis dissimilarity of river samples sorted by total ARGs

.

.
